# Supplementary material for: Differential effects of cotreatment of the antibiotic rifampin with host-directed therapeutics in reducing intracellular Staphylococcus aureus infection
Source: PeerJ journal article supplement (doi:10.7717/peerj.10330), 2020-11-10

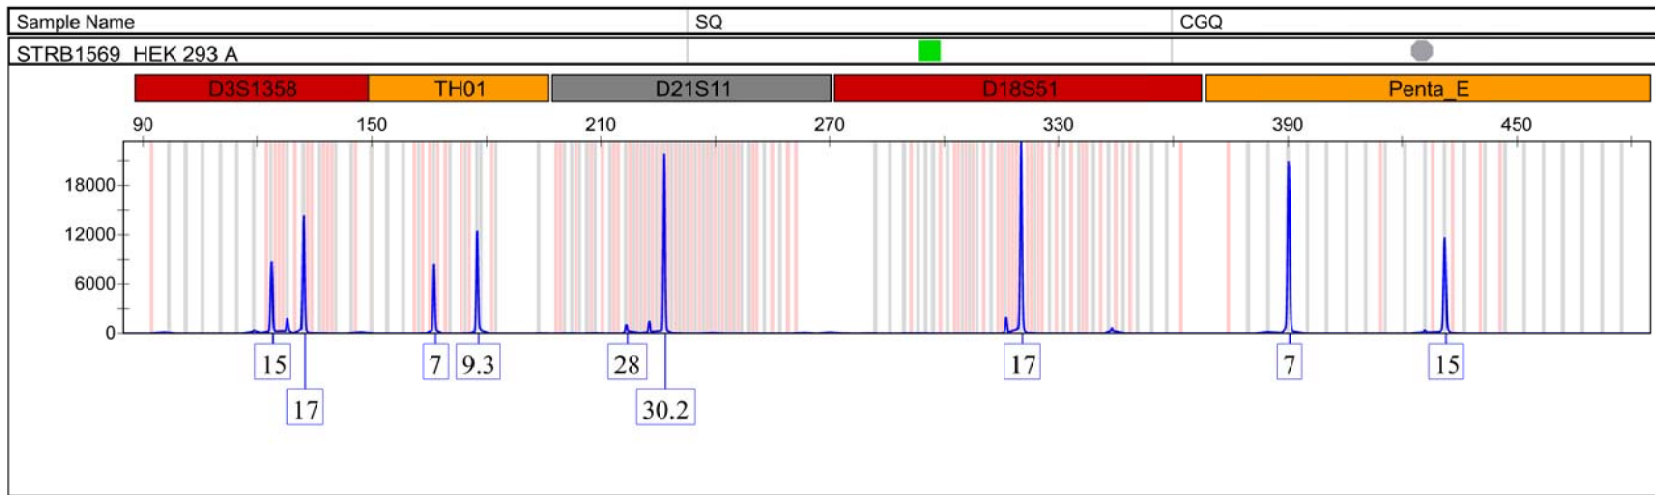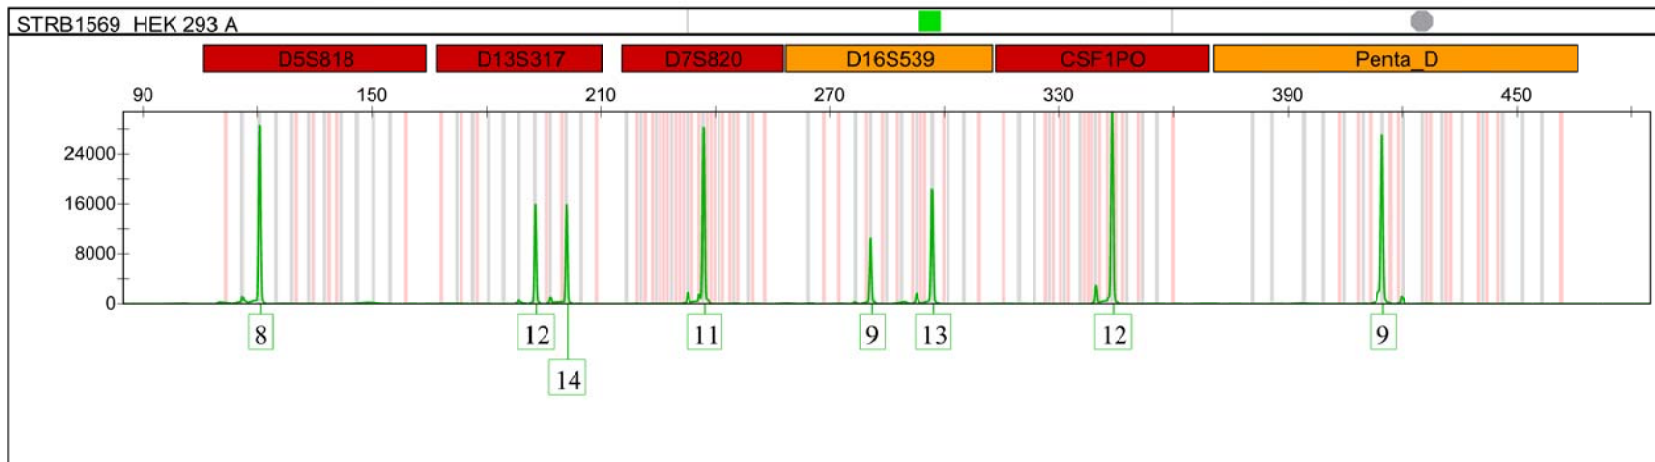

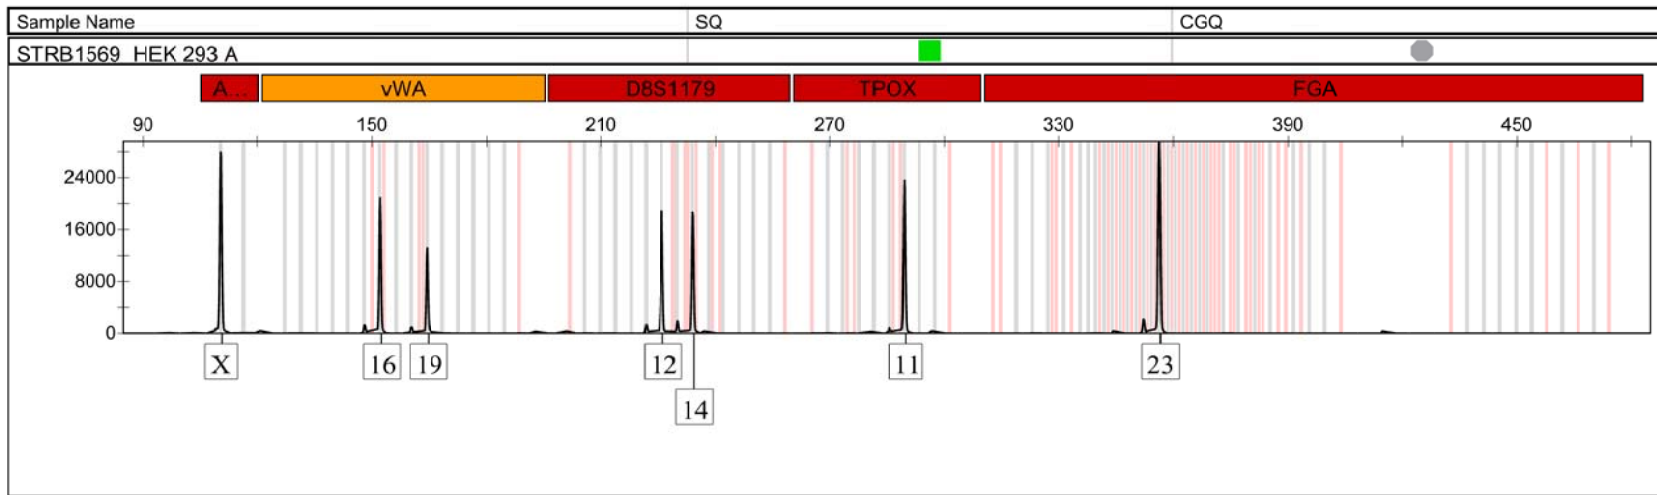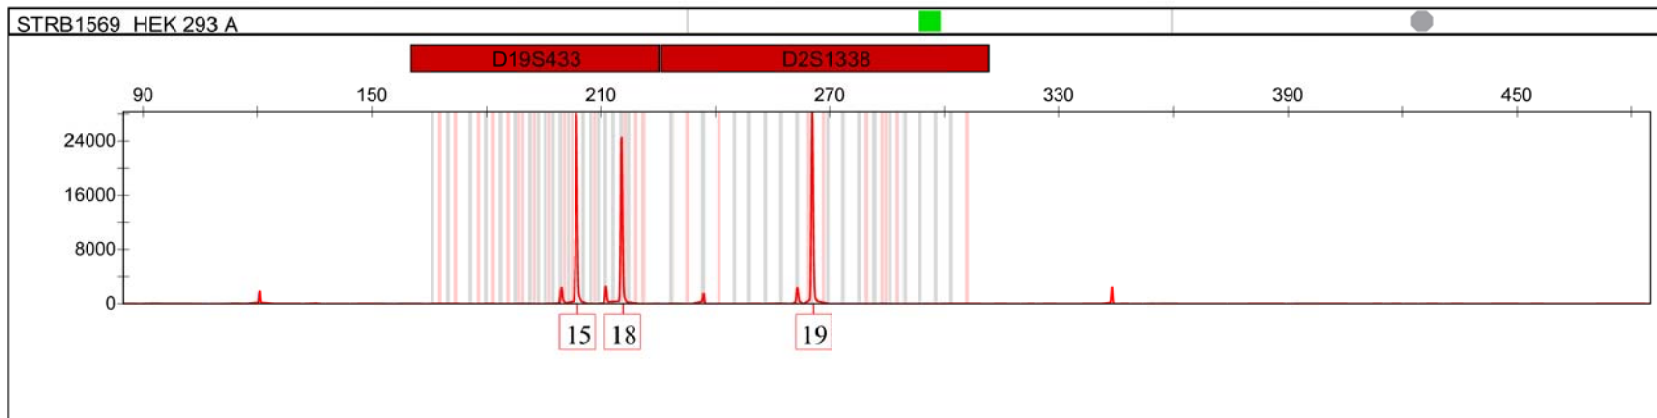

Supplement: Evans_M_Cell_Authentication_2.pdf [file Evans_M_Cell_Authentication_2.pdf]
