# Supplementary material for: Differential effects of cotreatment of the antibiotic rifampin with host-directed therapeutics in reducing intracellular Staphylococcus aureus infection
Source: PeerJ. 2020 Nov 10;8:e10330. doi: 10.7717/peerj.10330 (PMC7664464; doi:10.7717/peerj.10330)
Supplement: Supplemental Information 1 [file peerj-08-10330-s001.xlsx]

## Sheet: Figure 1
	Panel A				Panel B
	DMSO	ML141 (10 μM)			DMSO	ML141 (10 μM)	Rifampin (0.01 mg/L)	ML141 +Rifampin
CFU/ml	3635	2520		CFU/ml	617400	438900	419300	77200
	5425	2435			581000	569100	229600	75450
	3415	2100			504000	500500	315000	96500
	3360	2200

## Sheet: Figure 2
	Panel A							Panel B
	DMSO	ML141 (10 μM)	Rifampin (0.01 mg/L)	ML141+Rifampin				DMSO	ML141 (10 μM)	Rifampin (0.01 mg/L)	ML141 +Rifampin
Absorbance (490 nm)	0.711	0.694	0.624	0.75		% PI +	Experiment #1	7.42	11.99	6.38	9.36
	0.802	0.781	0.548	0.778				4.76	7.53	6.11	8.03
	0.878	0.662	0.831	0.782				4.74	7.07	6.62	6.64
	0.582	0.827	0.52	0.72			Experiment #2	10.69	15.91	11.07	11.94
								14.24	13.41	15.66	13.79
								16.85	14.15	12.12	9.17

## Sheet: Figure 3
	Panel A				Panel B
	DMSO	ML141 (10 μM)			DMSO	Rifampin (0.002 mg/L)	ML141 (10 μM) + Rifampin
CFU/ml	113040000	90360000		CFU/ml	136440000	28440000	37080000
	123120000	118080000			97560000	34560000	36720000
	110160000	137880000			148680000	32760000	43200000
	133200000	62640000

## Sheet: Figure 4
		Panel A						Panel B
		DMSO	Simvastatin (1 μM)	Rifampin (0.01 mg/L)	Simvastatin + Rifampin			DMSO	Simvastatin (1 μM)	Rifampin (0.01 mg/L)	Simvastatin + Rifampin
CFU/ml	Experiment #1	714000	676500	259500	463500		% PI +	7.86	13.41	7.69	8.25
		672500	401000	276000	612500			10.6	20.68	8.62	10.87
		1114500	430500	561000	484500			11.67	17.39	6.16	10.37
	Experiment #2	1075000	1128000	362000	370500
		1057500	715000	556000	469500
		980000	1158000	813500	889000
